# Supplementary material
Source: publisher site journal article supplement (https://www.spandidos-publications.com/883/downloadSupplementary)

Figure S1. AF and Ki67/p53 before POEM. XY scatter chart showing no correlation between (A) AF and Ki67, or (B) between AF and p53 before POEM. AF, aflatoxin; POEM, per oral endoscopic myotomy.

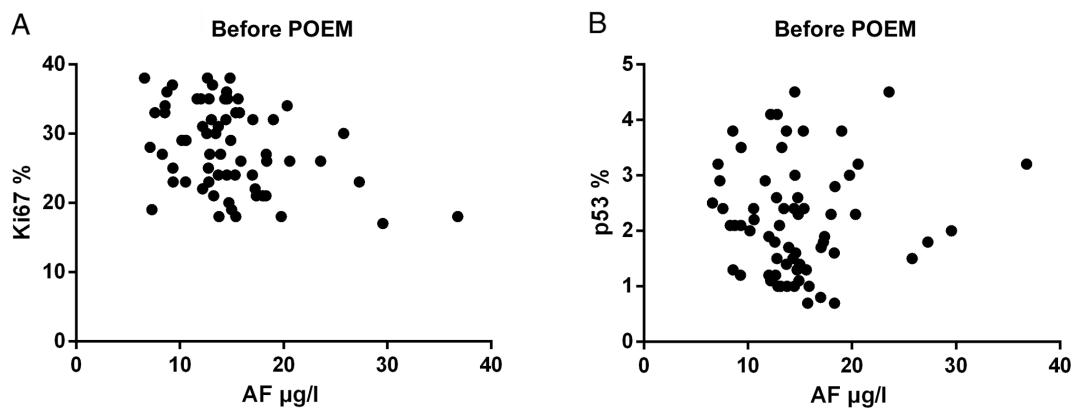

Figure S2. AF and Ki67/p53 after POEM. XY scatter chart showing no correlation between (A) AF and Ki67 or (B) between AF and p53 after POEM. AF, aflatoxin; POEM, per oral endoscopic myotomy.

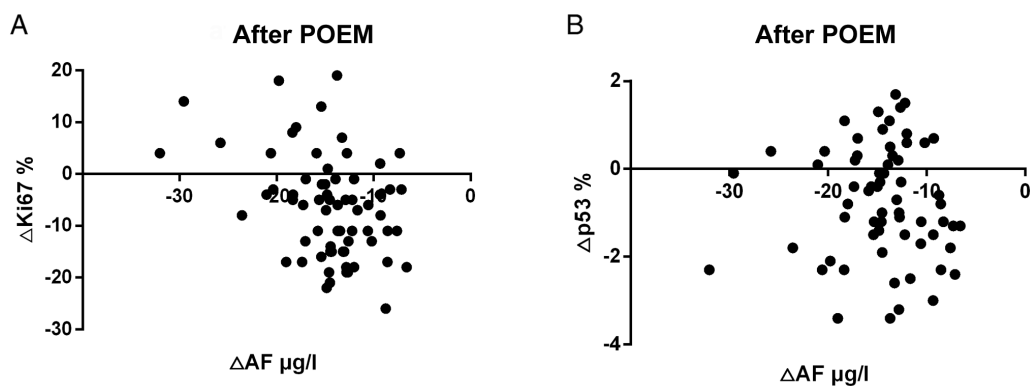

Supplement: Supplementary file 1 [file downloadSupplementary]
